# Supplementary material for: Ultrasonographic evaluation of intrinsic foot muscle thickness in soccer and basketball players: an observational study
Source: PeerJ. 2025 Aug 13;13:e19773. doi: 10.7717/peerj.19773 (PMC12357543; doi:10.7717/peerj.19773)
Supplement: Supplemental Information 1 [file peerj-13-19773-s001.xlsx]

## Sheet: DATA SET
Participants	Years	Weight (Kg)	Height (m)	GROUP (1 = SOCCER; 2 =BASKET)	BMI	Shoe Size	Intrinsic foot muscles (thickness), mm				Plantar fasciae
							Abductor Hallucis,mm	Flexor Hallucis Brevis,mm	Flexor Digitorum brevis, mm	Quadratus plantaris, mm	Plantar fascia (P1), mm	Plantar fascia (P2), mm	Plantar fascia (P3)
1	23	85	1.77	1	27.1314	43	9.96	7.68	8.46	9.34	0.73	1.27	1.25
2	24	84	1.7	1	29.0657	43	9.5	8.39	7.27	8.63	1.49	1.21	1.12
3	19	73	1.73	1	24.3911	41	11.43	9.08	7.46	10.81	1.37	1.55	1.37
4	23	71	1.79	1	22.1591	42.5	10.96	9.95	8.28	7.71	2.8	1.31	1.49
5	21	68	1.87	1	19.4458	43	7.52	8.65	7.8	7.76	1.68	1.35	1.32
6	26	83	1.81	1	25.335	44	14.03	12.8	8.11	9.61	1.21	0.98	0.93
7	26	94	1.88	1	26.5957	47	10.61	11.76	13.86	7.14	1.34	1.22	1.21
8	24	92	1.82	1	27.7744	43	10.89	10.3	8.91	8.49	1.66	1.39	1.34
9	19	83	1.79	1	25.9043	42	12.86	10.06	8.73	9.84	1.44	1.38	1.71
10	19	83	1.85	1	24.2513	47	11.47	11.06	10.12	7.66	1.73	1.71	1.5
11	22	74	1.8	1	22.8395	42	13.23	11.16	8.96	6.8	1.49	1.45	1.33
12	24	89	1.77	1	28.4082	44	10.27	8.45	9.94	9.36	1.49	1.72	1.33
13	34	71	1.72	1	23.9995	40	10	8.63	7.24	12.01	3.33	1.66	1.71
14	23	80	1.81	1	24.4193	45	10.9	10.6	6.96	6.89	1.68	1.41	1.39
15	22	79	1.84	1	23.3341	44	11.79	9.65	9.81	8.35	1.49	1.39	1.23
16	23	97	1.93	1	26.041	46	9.81	9.45	7.24	11.21	1.81	1.38	1.31
17	21	85	1.85	1	24.8356	44	8.8	8.19	9.17	5.14	1.99	2.1	1.22
18	20	73	1.83	2	21.7982	43	15.38	13.31	13.08	9.61	0.99	1.27	1.27
19	15	75	1.89	2	20.9961	47	13.6	9.77	10.34	8.4	1.66	1.5	1.33
20	18	77	1.9	2	21.3296	45	14.08	10.27	12.87	10.21	1.71	1.05	1.44
21	23	70	1.67	2	25.0995	43	11.87	9.75	10.78	7.93	1.78	1.65	1.36
22	22	80	1.84	2	23.6295	45	10.45	9.47	10.94	7.34	1.48	1.08	1.31
23	22	78	1.84	2	23.0388	44.5	12.82	9.87	10.91	8.14	1.51	1.43	1.31
24	24	79	1.8	2	24.3827	44	10.76	9.89	10.77	8.22	1.61	1.76	1.27
25	21	105	2.07	2	24.5047	49	14.35	10.98	11.2	8.76	1.46	1.15	1.33
26	23	82	1.88	2	23.2005	44	13.79	9.84	10.91	8.47	1.21	1.25	1.29
27	23	77	1.85	2	22.4982	45	12.24	10.56	11.15	10.15	1.47	1.56	1.43
28	21	85	2.01	2	21.0391	45	14.6	11.5	10.08	9.03	1.54	1.45	1.35
29	18	76	1.89	2	21.276	47.5	15.17	11.67	11.23	9.5	1.49	1.34	1.29
30	24	76	1.74	2	25.1024	44	13.07	10.15	11.11	9.14	1.53	1.42	1.34
31	21	65	1.84	2	19.199	45	10.45	10.01	11.05	8.39	1.34	1.63	1.36
32	24	80	1.83	2	23.8884	45	9.45	8.91	10.83	7.67	1.24	1.32	1.21
33	23	77	1.85	2	22.4982	44	10.98	9.68	10.97	8.24	1.85	1.83	1.32
34	23	75	1.87	2	21.4476	45	13.64	10.3	11.02	8.27	1.79	1.64	1.38
35	23	78	1.9	2	21.6066	45	13.4	10.12	11.06	9.25	1.2	1.21	1.41
		78.2222	1.86111				12.7833	10.3361
		81.8235	1.80765				11.8835	9.62812
